# Supplementary material
Source: Springer Nature journal article supplement (https://www.springermedizin.de/resource/supplementary/13054_2013_3031_MOESM1_ESM.pdf/9712436)
Supplement: MOESM1 [file 9712436]

Patients admitted to the SICU  
During the study period  
(n=775)

Delirium assessment  
(n=562)

Discharged alive from hospital  
(n=532)

Alive at 6-month follow-up  
(n=488)

Participate at 6-month follow-up  
(n=358)

With exclusion criteria  
(n=213)

118 underwent emergency surgery  
43 stayed < 12 hours in PACU  
6 neurosurgery cases  
13 had < 18 years old  
8 had previous delirium  
9 impossible to evaluate delirium  
3 readmissions  
3 Incapable providing informed consent  
6 with alcohol or drug abuse  
2 with incapacitating neurological disease  
1 refused to participate

30 died

44 died

Alive but not filling  
in the questionnaire  
(n=130)
